# Supplementary material
Source: PubMed Central journal article supplement (PMC6778236)

## Supporting information

**Fig. 1. ACDase cleaves ceramide more efficiently than galactosylceramide.** ACDase is much less efficient at deacylating GalCer compared to ceramide (Cer). Ceramide is deacylated by ACDase at least 8-10 times more efficiently compared to galactosylceramide.

**Fig. 2. Biochemically, Twi/FD mice and FD are indistinguishable at terminal age. (A)** There is no psychosine accumulation in the brain, sciatic nerve, liver, or spleen of WT, FD or Twi/FD mice at a terminal time point. The Y axes in these graphs are drawn to the same scale as the y axes in Fig. 2 to facilitate comparison. Note: all of the Twi mice are dead at these time points. **(B)** There is no significant difference in the ceramide levels in the liver and spleen between terminal Twi/FD and FD mice. (\*  $p \leq 0.05$ )

**Fig. 3. Twi/FD mice and FD mice are indistinguishable hematologically and clinically at terminal time points. (A)** At ~63 days, tremors of similar frequencies begin to develop in Twi/FD and FD mice. Motor impairments in **(B)** rotarod and **(C)** wirehang tests develop in FD and Twi/FD mice by ~63 days. **(D)** There is an apparent increase in circulating monocyte and neutrophil populations and a significant decrease in T cell populations at ~60 days of age in FD and Twi/FD mice compared to age-matched WT mice. Note: at ~36 days of age when Twi mice were available for comparison, there were no significant changes in the hematological parameters between any of the genotypes. **(E)** At terminal time points, there is an increase in diffuse and focal areas of activated microglia (CD68+, arrows) in FD and Twi/FD mice compared to 36 days of age. Mild structural degeneration with immune cell infiltration (arrows) is seen in FD and Twi/FD sciatic nerves at a terminal time point, but is less pronounced than 36 day-old Twi mice. **(F)** Sciatic nerve axon density trends lower in terminal FD and Twi/FD mice

relative to comparably aged WT mice, but the axon number has not decreased from 36 days of age (Fig. 3K). (ns  $p > 0.05$ , \*  $p \leq 0.05$ , \*\*\*  $p \leq 0.001$ )

## Supporting Information Figures

### SI1 ACDase Efficiency

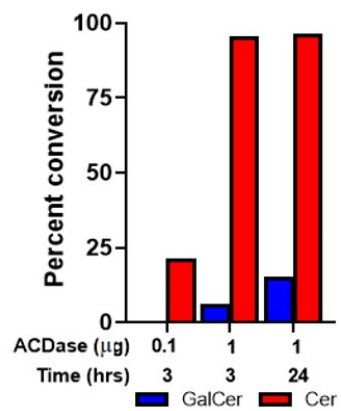

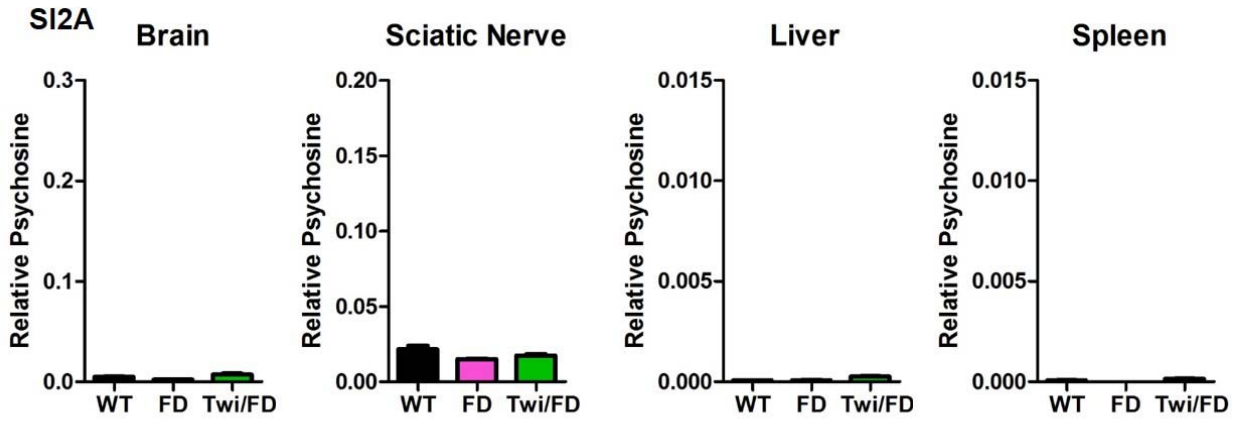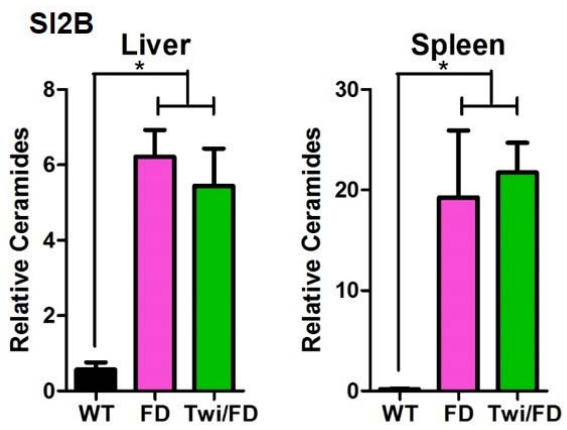

SI3A

Peak Tremor Frequency

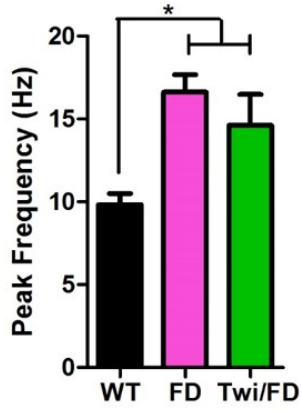

SI3B

Rotarod

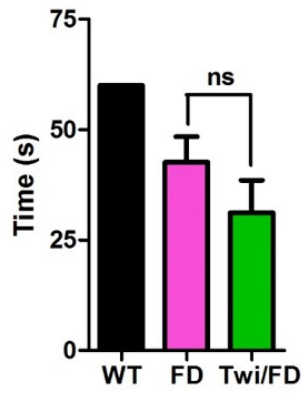

SI3C

Wirehang

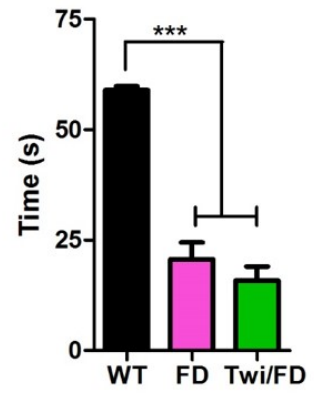

SI3D

Monocytes

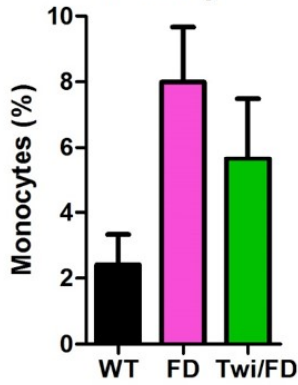

Neutrophils

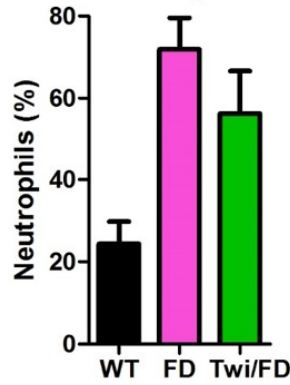

T Cells

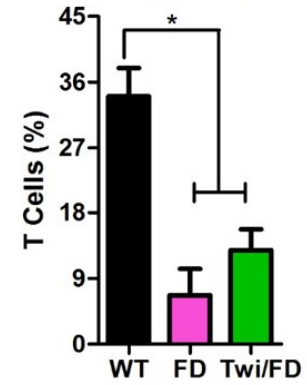

SI3E

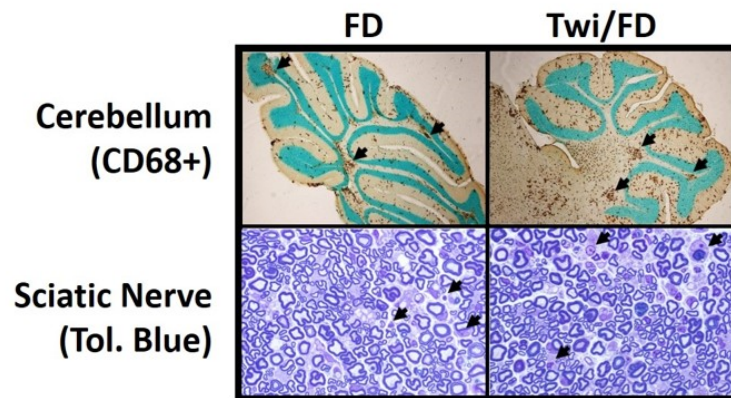

SI3F

SN Axon Count

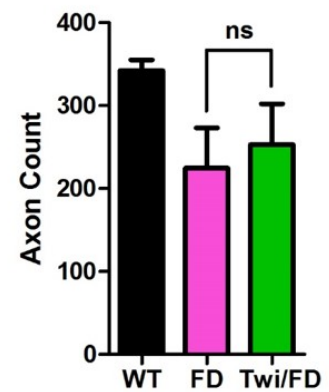

Supplement: pnas.1912108116.sapp.pdf [file pnas.1912108116.sapp.pdf]
